# Supplementary material for: A Deep Learning Network for Classifying Arteries and Veins in Montaged Widefield OCT Angiograms
Source: PubMed Central journal article supplement — Ophthalmol Sci. 2022 Apr 1;2(2):100149. doi: 10.1016/j.xops.2022.100149 (PMC9562370; doi:10.1016/j.xops.2022.100149), 2022-04-01
Supplement: mmc2.pdf [file mmc2.pdf]

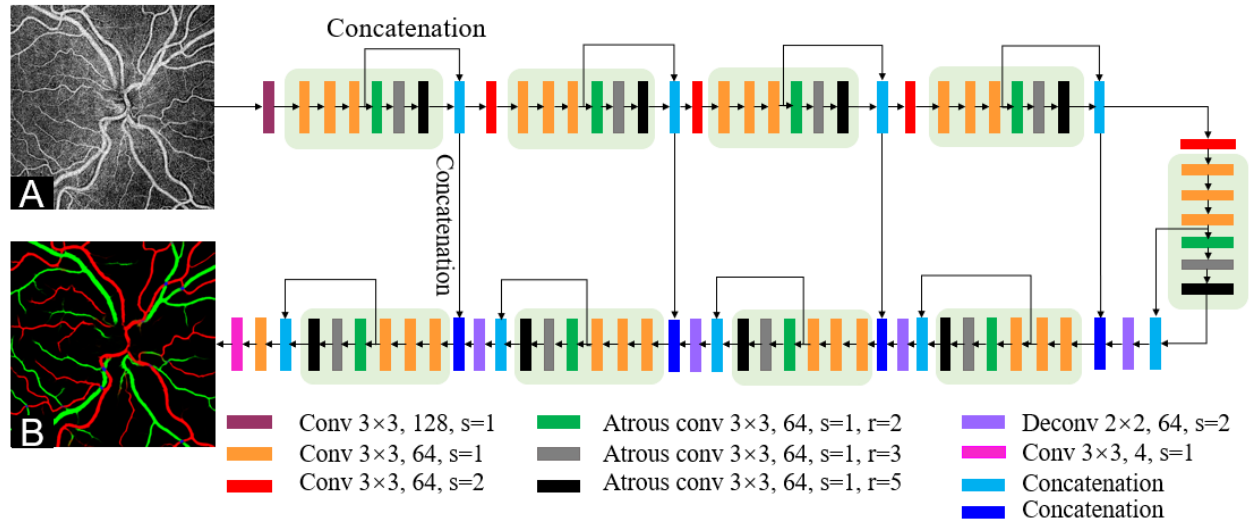

Figure 1. CAVnet architecture. (A) is the input, consisting of an OCT angiogram of the inner retina. CAVnet has a U-net-like structure. The different colored rectangles represent operations with different parameters. The stride is represented by  $s$ . The dilation of the atrous convolutional layer is represented by  $r$ . The segmentation results output by CAVnet distinguishes between arteries and veins (B).
