# Supplementary material for: A Deep Learning Network for Classifying Arteries and Veins in Montaged Widefield OCT Angiograms
Source: PubMed Central journal article supplement — Ophthalmol Sci. 2022 Apr 1;2(2):100149. doi: 10.1016/j.xops.2022.100149 (PMC9562370; doi:10.1016/j.xops.2022.100149), 2022-04-01
Supplement: mmc3.pdf [file mmc3.pdf]

Table 1. Parameters of CAVnet

| Layers        | Operation     | Filter number | Filter size | stride | Dilation rate | Activation |
|---------------|---------------|---------------|-------------|--------|---------------|------------|
| Conv1         | convolution   | 128           | 3×3         | 1      | -             | Leaky ReLU |
| Sub-module1   | -             | -             | -           | -      | -             | -          |
| Conv2         | convolution   | 64            | 3×3         | 2      | -             | Leaky ReLU |
| Sub-module2   | -             | -             | -           | -      | -             | -          |
| Conv3         | convolution   | 64            | 3×3         | 2      | -             | Leaky ReLU |
| Sub-module3   | -             | -             | -           | -      | -             | -          |
| Conv4         | convolution   | 64            | 3×3         | 2      | -             | Leaky ReLU |
| Sub-module4   | -             | -             | -           | -      | -             | -          |
| Conv5         | convolution   | 64            | 3×3         | 2      | -             | Leaky ReLU |
| Sub-module5   | -             | -             | -           | -      | -             | -          |
| dConv6        | deconvolution | 64            | 2×2         | 2      | -             | -          |
| Concatenation | Concatenation | 128           | -           | -      | -             | -          |
| Sub-module6   | -             | -             | -           | -      | -             | -          |
| dConv7        | deconvolution | 64            | 2×2         | 2      | -             | -          |
| Concatenation | Concatenation | 128           | -           | -      | -             | -          |
| Sub-module7   | -             | -             | -           | -      | -             | -          |
| dConv8        | deconvolution | 64            | 2×2         | 2      | -             | -          |
| Concatenation | Concatenation | 128           | -           | -      | -             | -          |
| Sub-module8   | -             | -             | -           | -      | -             | -          |
| dConv9        | deconvolution | 64            | 2×2         | 2      | -             | -          |
| Concatenation | Concatenation | 128           | -           | -      | -             | -          |
| Sub-module9   | -             | -             | -           | -      | -             | -          |
| Conv10        | convolution   | 64            | 3×3         | 1      | -             | Leaky ReLU |
| Conv11        | convolution   | 4             | 3×3         | 1      | -             | Softmax    |
