# Supplementary material for: A Deep Learning Network for Classifying Arteries and Veins in Montaged Widefield OCT Angiograms
Source: PubMed Central journal article supplement — Ophthalmol Sci. 2022 Apr 1;2(2):100149. doi: 10.1016/j.xops.2022.100149 (PMC9562370; doi:10.1016/j.xops.2022.100149), 2022-04-01
Supplement: mmc4.pdf [file mmc4.pdf]

Table 2. Parameters of sub-module

| Layers              | Operation     | Filter number | Filter size | Stride | Dilation rate | Activation |            |
|---------------------|---------------|---------------|-------------|--------|---------------|------------|------------|
| Sub-module          | convolution   | 64            | 3×3         | 1      | -             | Leaky ReLU |            |
|                     | Block1        | convolution   | 64          | 3×3    | 1             | -          | Leaky ReLU |
|                     | convolution   | 64            | 3×3         | 1      | -             | Leaky ReLU |            |
|                     | convolution   | 64            | 3×3         | 1      | 2             | Leaky ReLU |            |
|                     | Block1        | convolution   | 64          | 3×3    | 1             | 3          | Leaky ReLU |
|                     | convolution   | 64            | 3×3         | 1      | 5             | Leaky ReLU |            |
| Concatenation layer | Concatenation | 128           | -           | -      | -             | -          |            |
